# Supplementary material for: A PET-based fluorometric chemosensor for the determination of mercury(ii) and pH, and hydrolysis reaction-based colorimetric detection of hydrogen sulfide
Source: Royal Society of Chemistry journal article supplement (doi:10.1039/c6dt00147e), 2016-01-01
Supplement: c6dt00147e1.pdf [file c6dt00147e1.pdf]

## Supporting Information

### A PET-based fluorometric chemosensor for determination of mercury (II) and pH, and hydrolysis reaction-based colorimetric detection of hydrogen sulfide

Jae Jun Lee,<sup>a</sup> Yong Sung Kim,<sup>a</sup> Eunju Nam,<sup>b</sup> Sun Young Lee,<sup>a</sup> Mi Hee Lim,<sup>b\*</sup> Cheal Kim<sup>a\*</sup>

<sup>a</sup>Department of Fine Chemistry and Department of Interdisciplinary Bio IT Materials, Seoul National University of Science and Technology, Seoul 139-743, Republic of Korea. Fax: +82-2-973-9149; Tel: +82-2-970-6693; E-mail: [chealkim@seoultech.ac.kr](mailto:chealkim@seoultech.ac.kr)

<sup>b</sup>Department of Chemistry, Ulsan National Institute of Science and Technology (UNIST), Ulsan 44919, Republic of Korea. Fax: +82-52-217-5409; Tel: +82-52-217-5422; E-mail: [mhlim@unist.ac.kr](mailto:mhlim@unist.ac.kr)

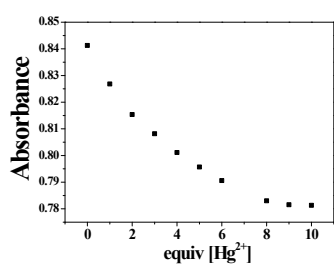

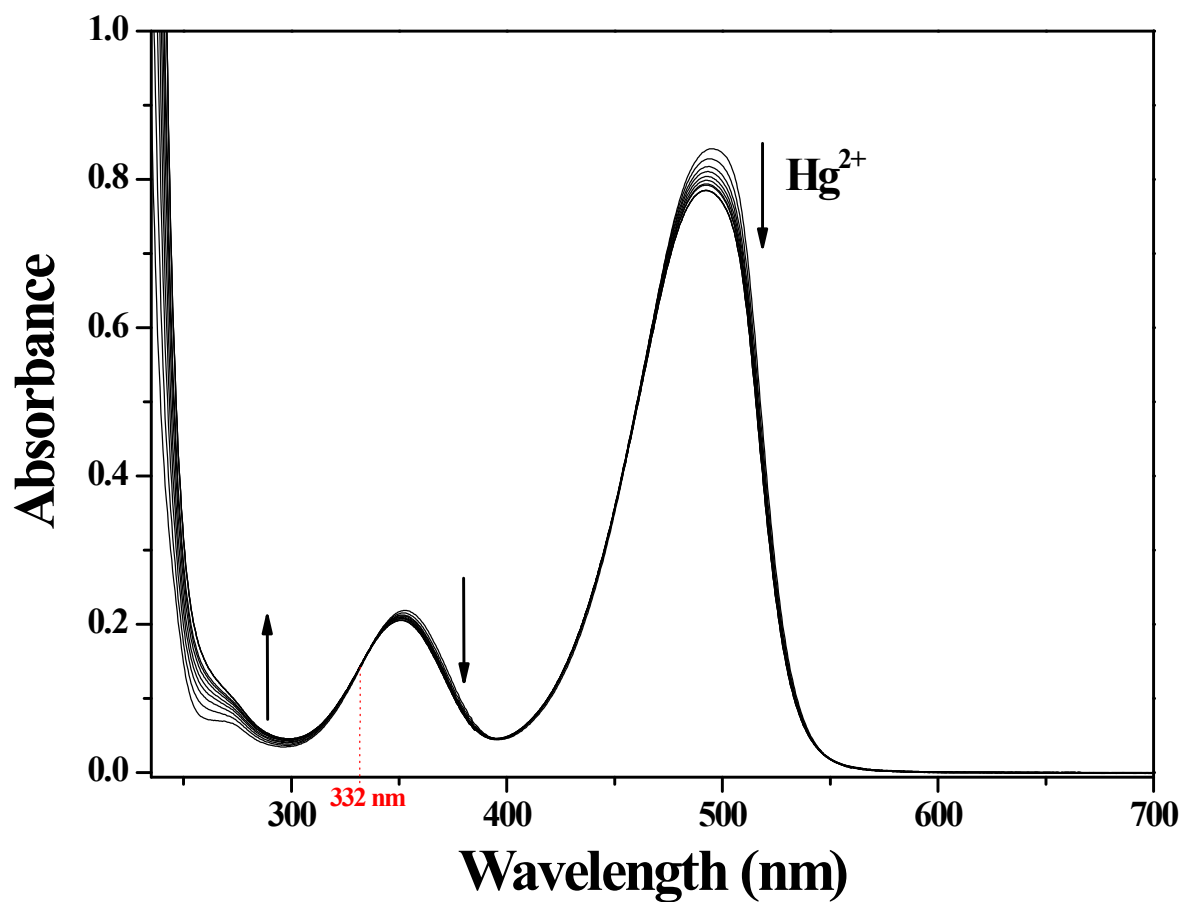

**Fig. S1.** Absorption spectral changes of **1** (10 μM) in the presence of increasing different concentrations of Hg<sup>2+</sup> (from 0 to 10 equiv) at room temperature. Inset: Plot of the absorbance intensity at 497 nm as a function of Hg<sup>2+</sup> concentration.

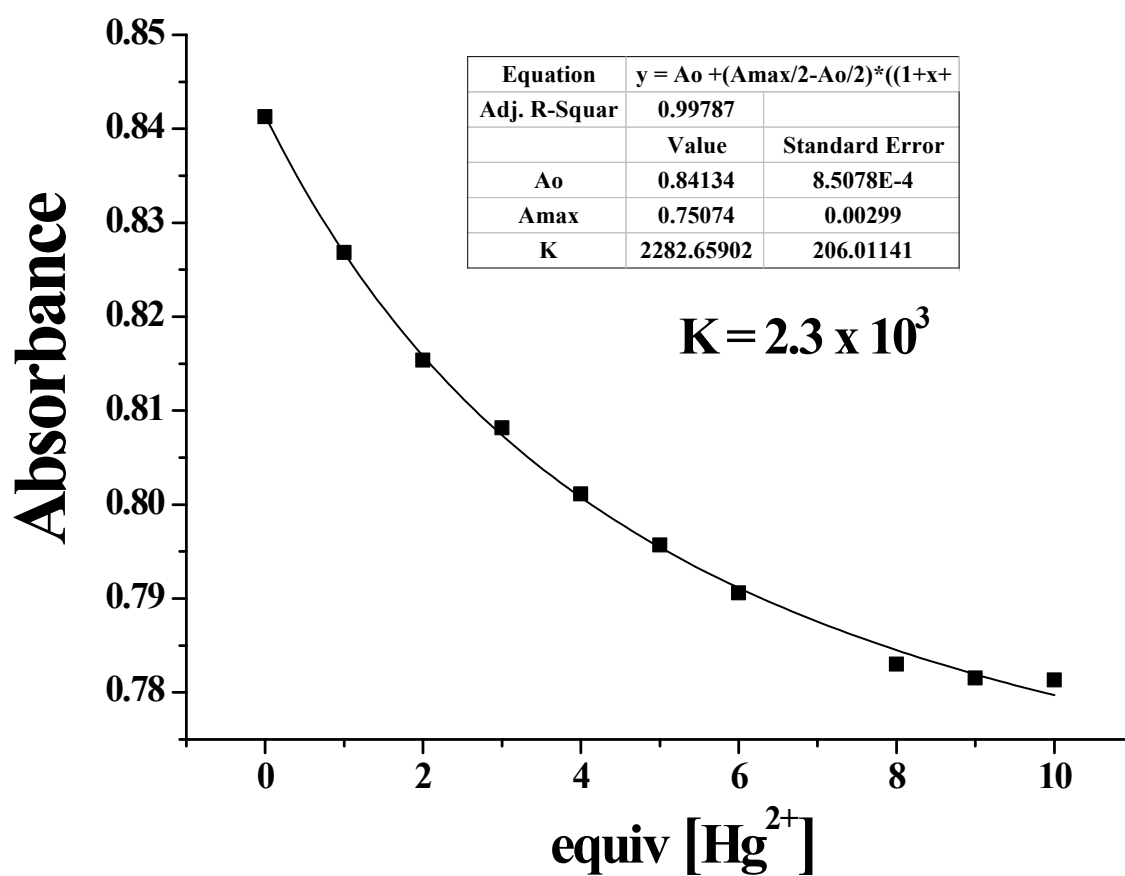

**Fig. S2.** Absorption intensity (at 497 nm) of **1** (10  $\mu$ M) after addition of increasing different concentration of  $\text{Hg}^{2+}$  ions. The black line is the non-linear fitting curve between **1** and  $\text{Hg}^{2+}$ . Association constant ( $K$ ) of **1** with  $\text{Hg}^{2+}$  was calculated by the non-linear least square curve fitting.

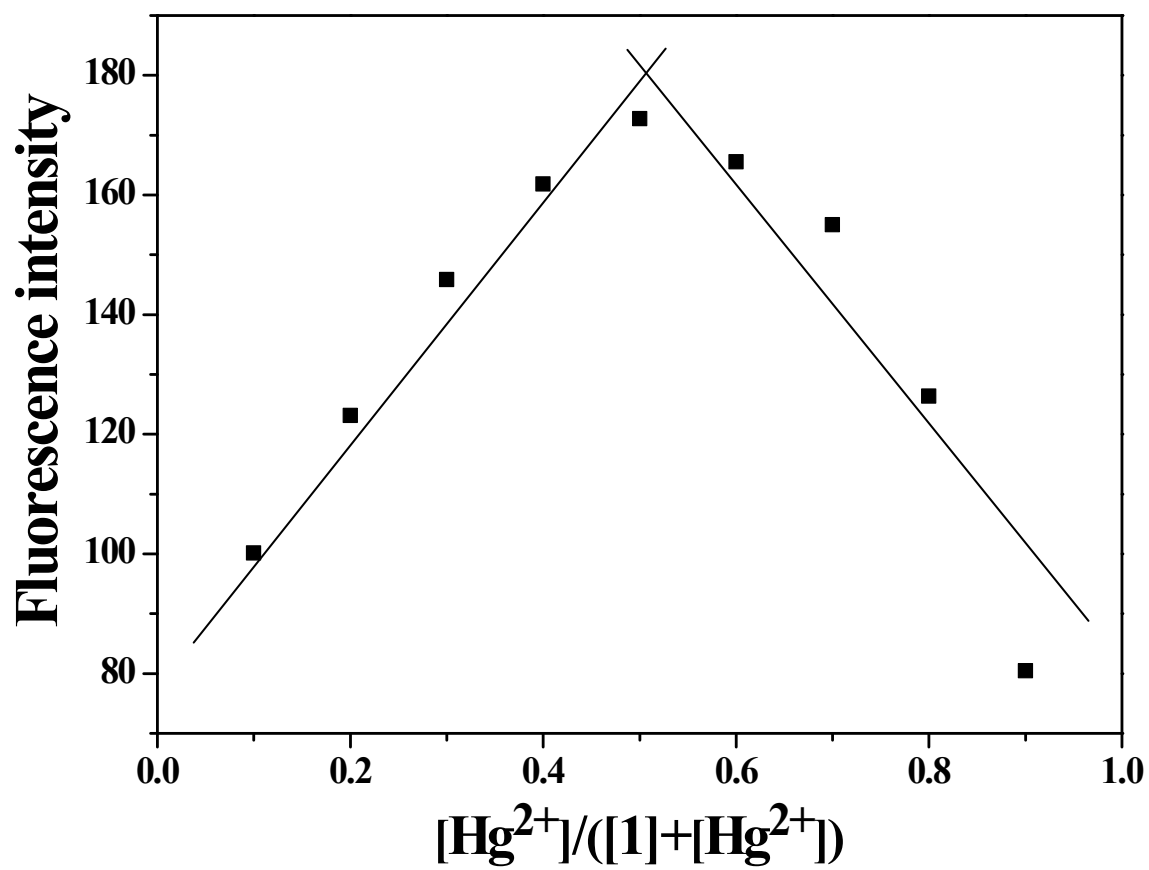

**Fig. S3.** Job plot for the binding of **1** with Hg<sup>2+</sup>. Fluorescence intensity at 530 nm was plotted as a function of the molar ratio of [Hg<sup>2+</sup>]/([**1**]+[Hg<sup>2+</sup>]). The total concentration of Hg<sup>2+</sup> ions with receptor **1** was 1.0 × 10<sup>-5</sup> M.

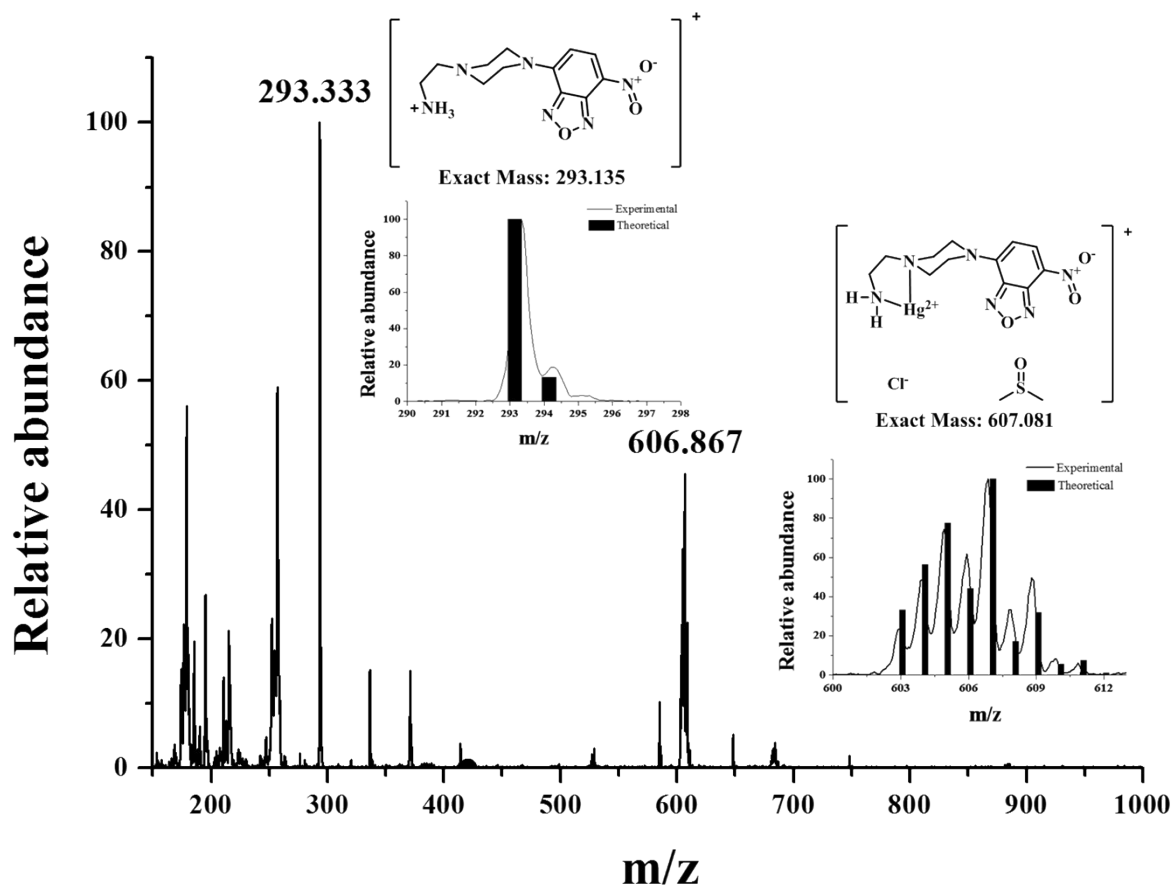

**Fig. S4.** Positive-ion electrospray ionization mass spectrum of **1** (10  $\mu\text{M}$ ) upon addition of  $\text{Hg}(\text{NO}_3)_2$  (1 equiv).

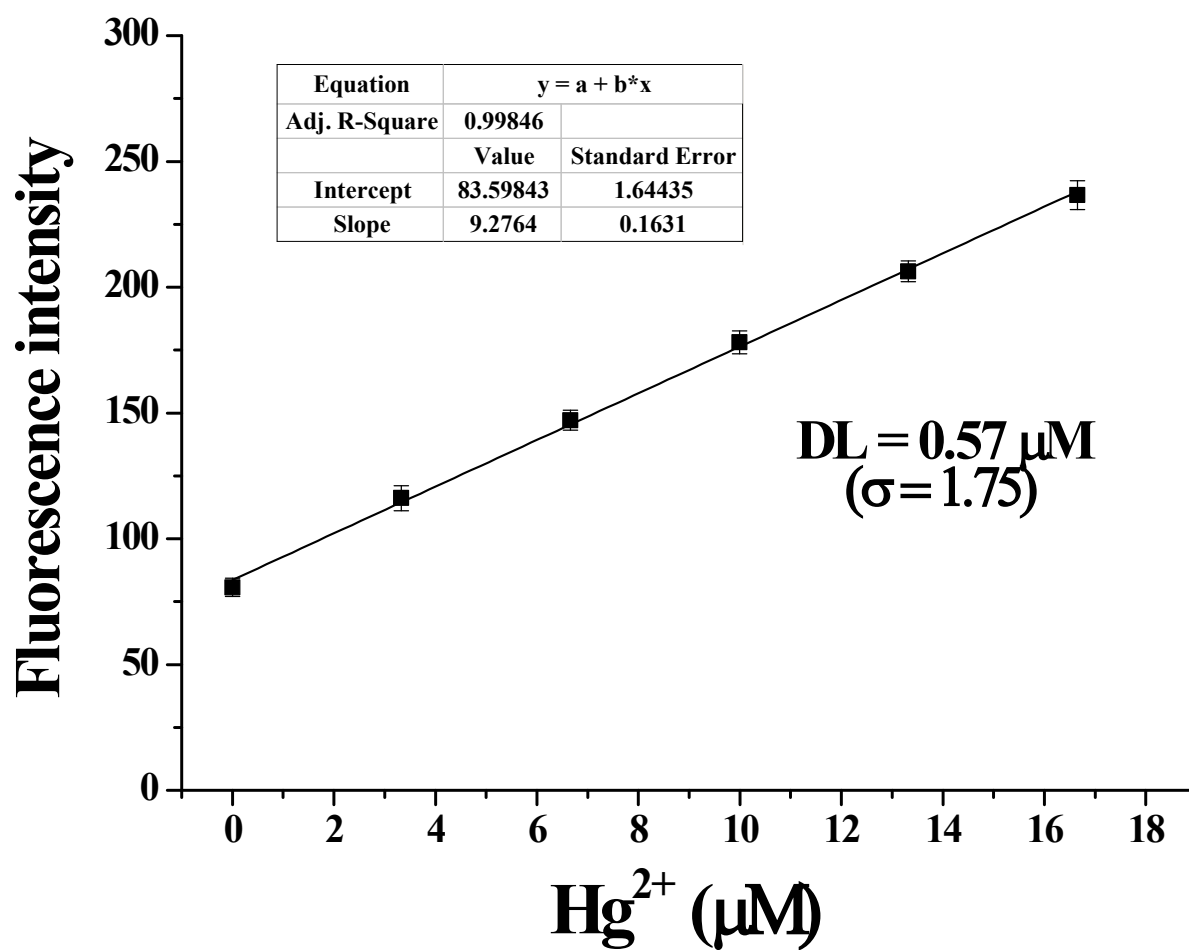

**Fig. S5.** Fluorescence intensity (at 542 nm) of **1** as a function of  $\text{Hg}^{2+}$  concentration in bis-tris buffer (10 mM bis-tris, pH = 7.0).  $[\mathbf{1}] = 10 \mu\text{mol/L}$  and  $[\text{Hg}^{2+}] = 0\text{-}16.66 \mu\text{mol/L}$ .

(a)

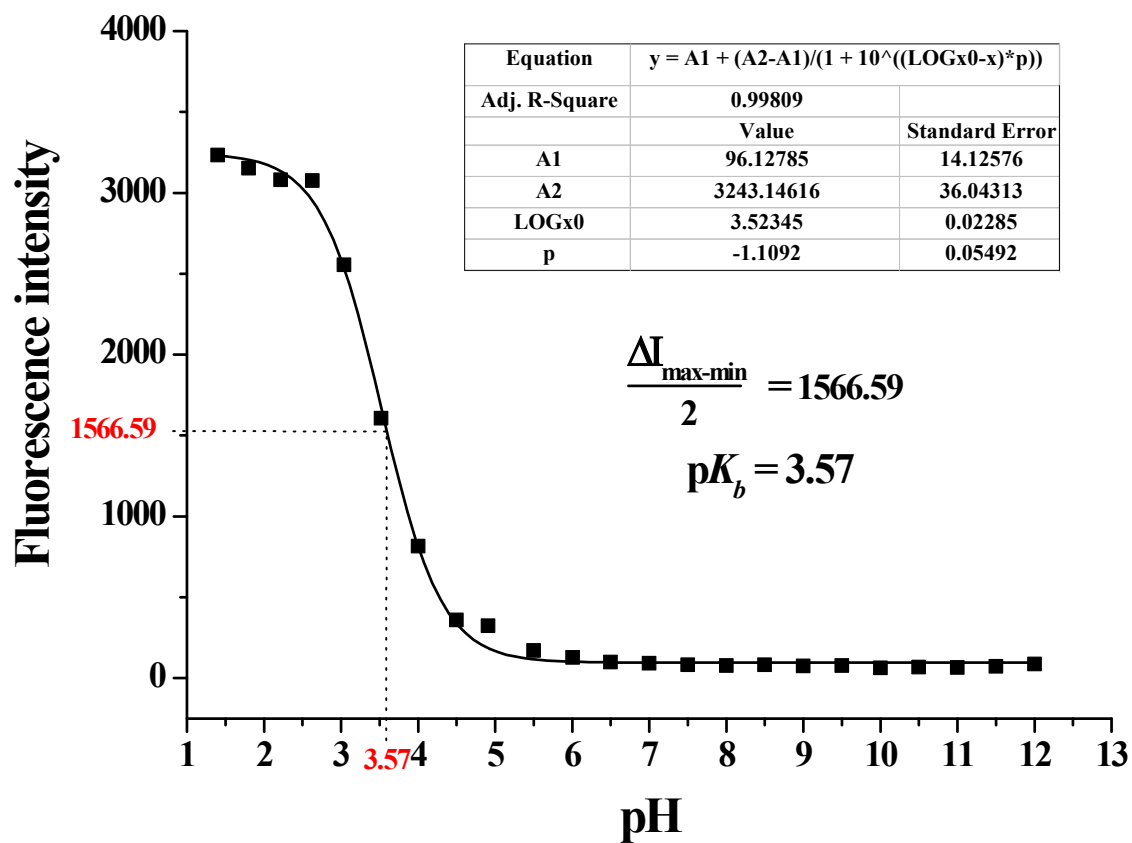

(b)

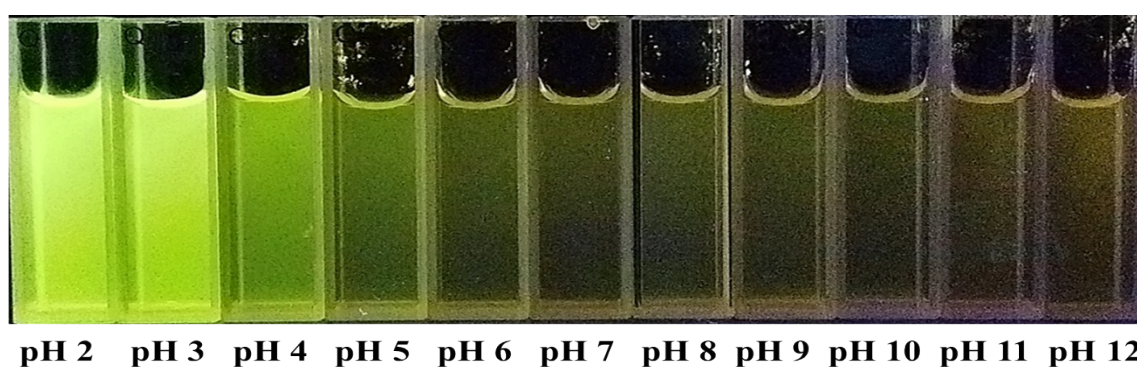

**Fig. S6.** (a) Fluorescence intensity (at 542 nm) of **1** (10  $\mu\text{M}$ ) at different pH (2-12). (b) Pictures of fluorescence color of **1** (10  $\mu\text{M}$ ,  $\lambda_{\text{ex}} = 365 \text{ nm}$ ) at different pH (2-12).

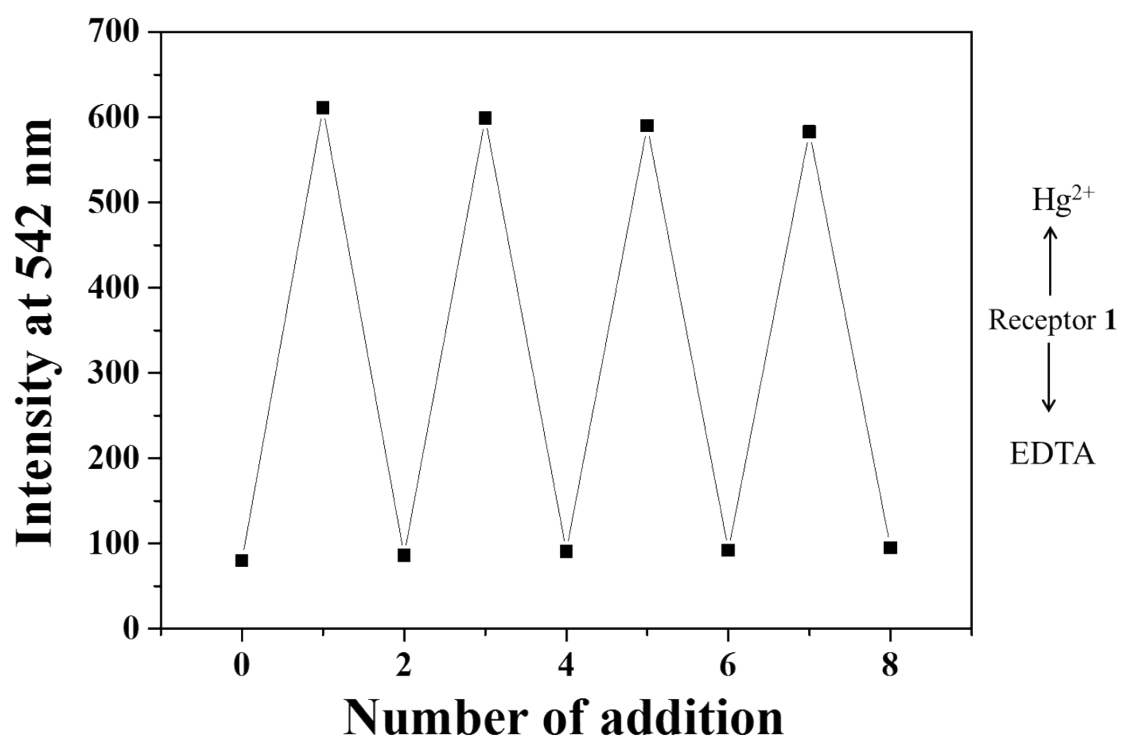

**Fig. S7.** Fluorescence spectral changes of **1** (10  $\mu\text{M}$ ) after the sequential addition of  $\text{Hg}^{2+}$  and EDTA.



(a)

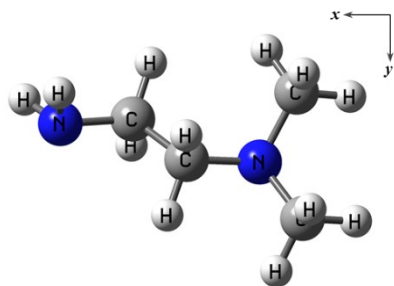

(b)

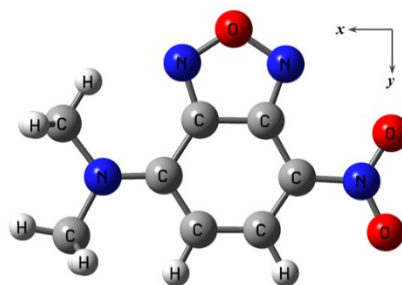

(c)

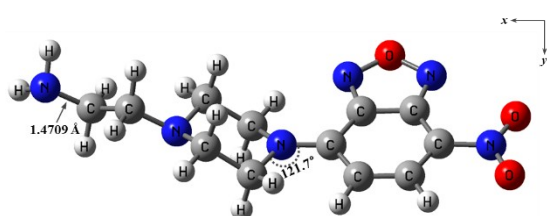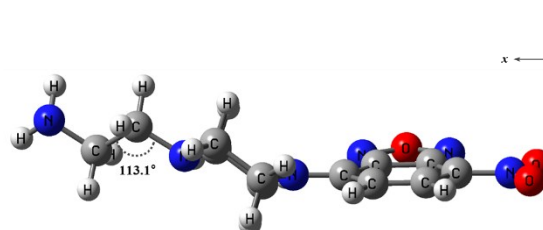

(d)

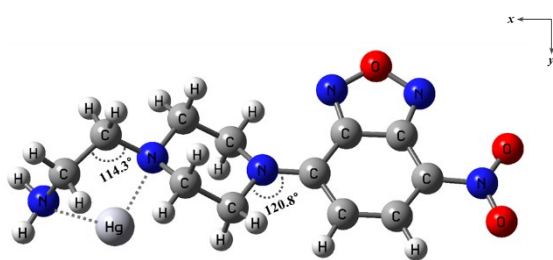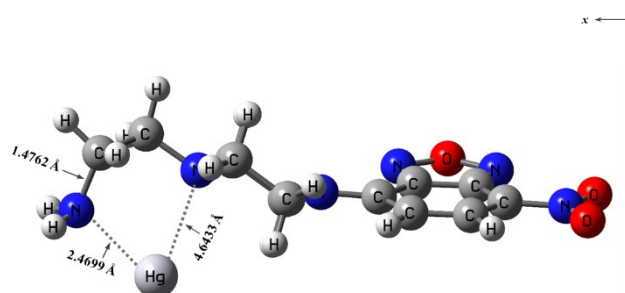

**Fig. S8.** Energy-minimized structures of (a) **R**, (b) **F**, (c) **1** and (d) **1-Hg<sup>2+</sup>** complex from B3LYP level.

(a)

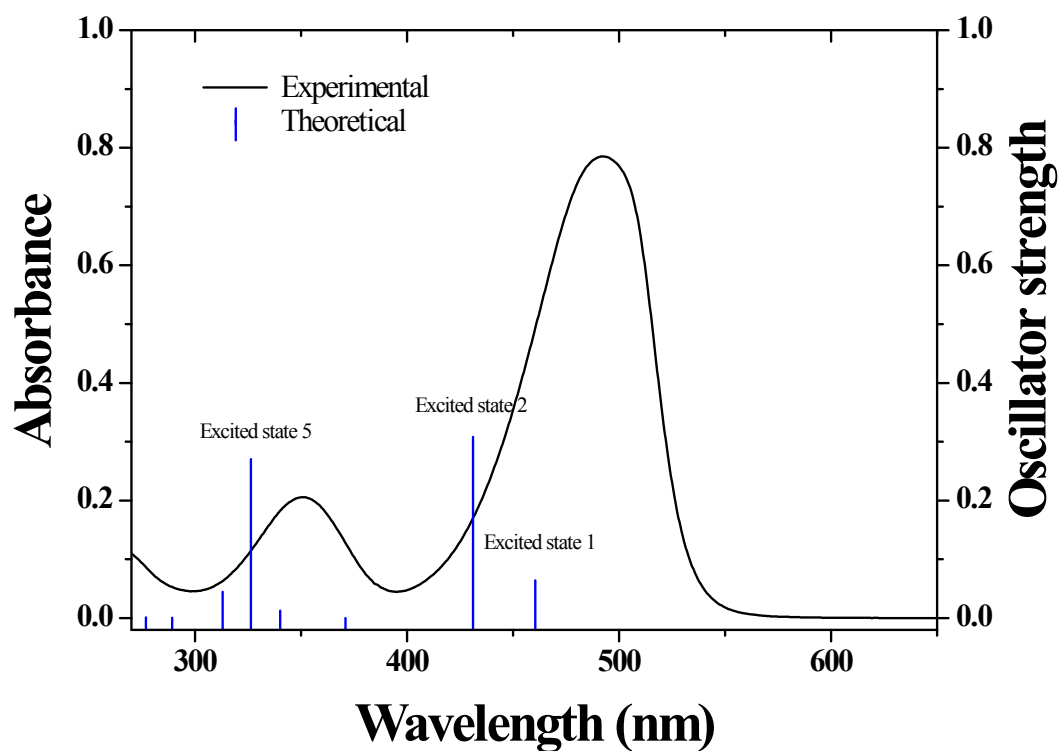

(b)

| Excited State 1     | Wavelength | percent | Oscillator strength |
|---------------------|------------|---------|---------------------|
| H $\rightarrow$ L   | 460.48 nm  | 55 %    | 0.0640              |
| H-1 $\rightarrow$ L |            | 44 %    |                     |
| Excited State 2     | Wavelength | percent | Oscillator strength |
| H-1 $\rightarrow$ L | 431.04 nm  | 54 %    | 0.3079              |
| H $\rightarrow$ L   |            | 42 %    |                     |
| H $\rightarrow$ L+1 |            | 3 %     |                     |
| Excited State 5     | Wavelength | percent | Oscillator strength |
| H $\rightarrow$ L+1 | 326.43 nm  | 95 %    | 0.2703              |
| H $\rightarrow$ L   |            | 3 %     |                     |

**Fig. S9.** (a) The theoretical excitation energies and the experimental UV-vis spectrum of **1**. (b) The major electronic transition energies and molecular orbital contributions for **1** (H = HOMO

and L = LUMO).

(a)

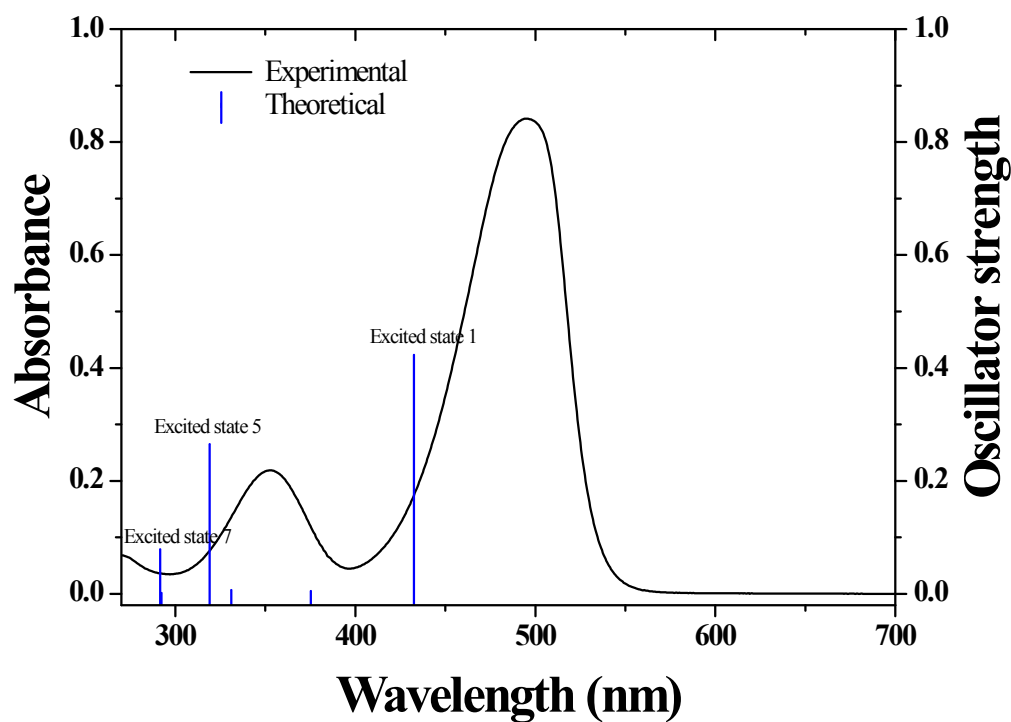

(b)

| Excited State 1       | Wavelength | percent | Oscillator strength |
|-----------------------|------------|---------|---------------------|
| H $\rightarrow$ L     | 432.51 nm  | 96 %    | 0.4230              |
| H $\rightarrow$ L+2   |            | 3 %     |                     |
| Excited State 5       | Wavelength | percent | Oscillator strength |
| H $\rightarrow$ L+2   | 318.98 nm  | 94 %    | 0.2654              |
| H $\rightarrow$ L     |            | 3 %     |                     |
| Excited State 7       | Wavelength | percent | Oscillator strength |
| H-1 $\rightarrow$ L+1 | 291.46 nm  | 95 %    | 0.0788              |

**Fig. S10.** (a) The theoretical excitation energies and the experimental UV-vis spectrum of 1-Hg<sup>2+</sup>. (b) The major electronic transition energies and molecular orbital contributions for 1-Hg<sup>2+</sup> (H = HOMO and L = LUMO).

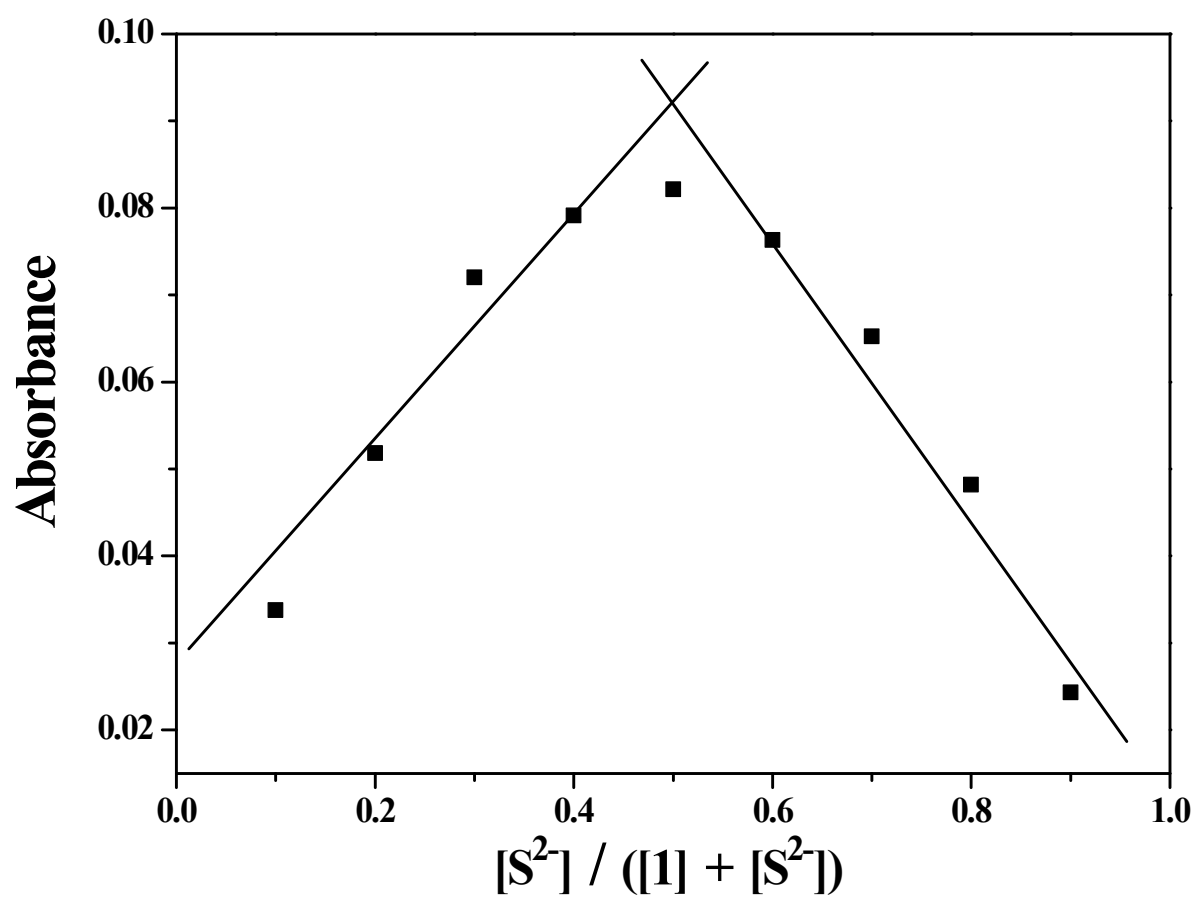

**Fig. S11.** Job plot for the binding of **1** with  $S^{2-}$ . Absorption intensity at 350 nm was plotted as a function of the molar ratio of  $[S^{2-}]/([1]+[S^{2-}])$ . The total concentration of  $S^{2-}$  ions with receptor **1** was  $1.0 \times 10^{-5}$  M.

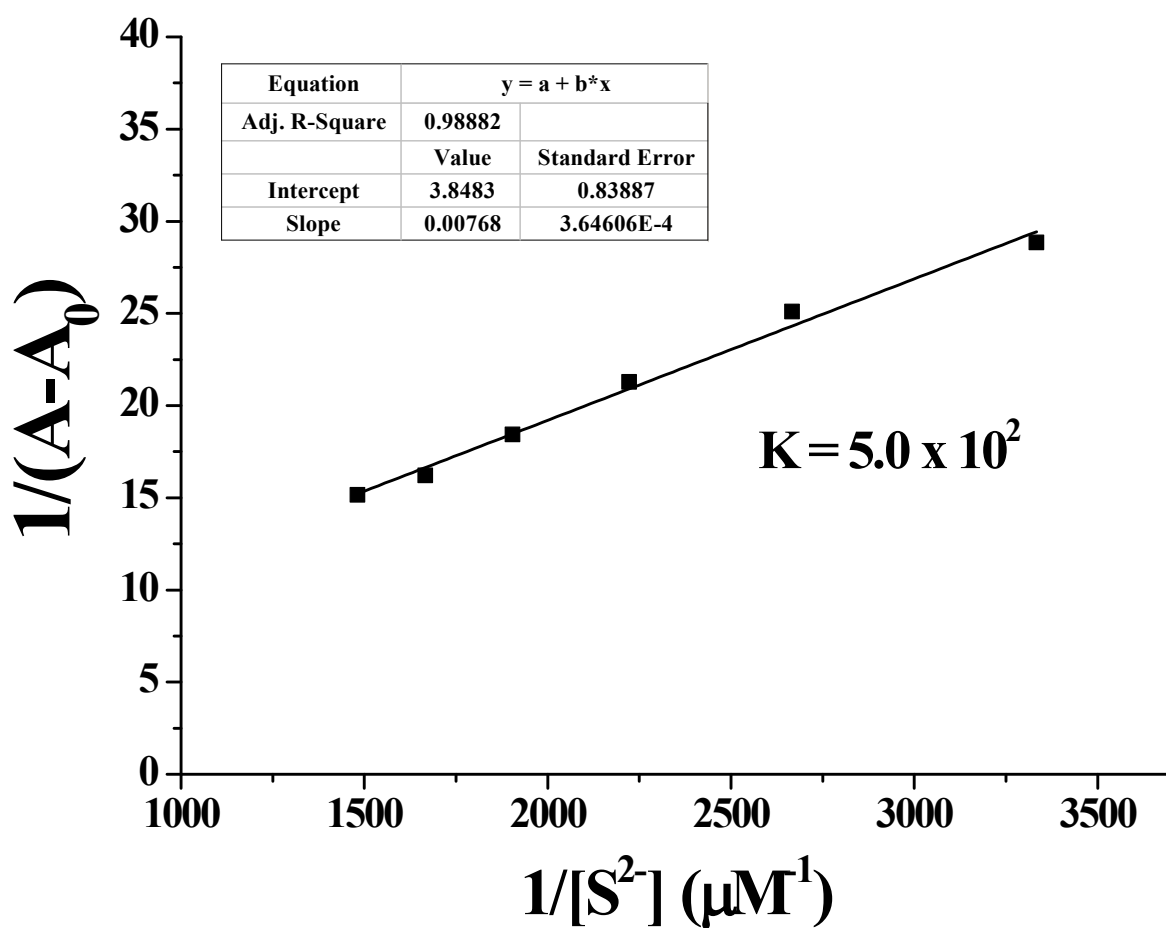

**Fig. S12.** Benesi-Hildebrand plot ( $\lambda_{\text{abs}} = 531 \text{ nm}$ ) of **1** (10  $\mu\text{M}$ ), assuming a 1:1 stoichiometry for association between **1** and  $\text{S}^{2-}$ .

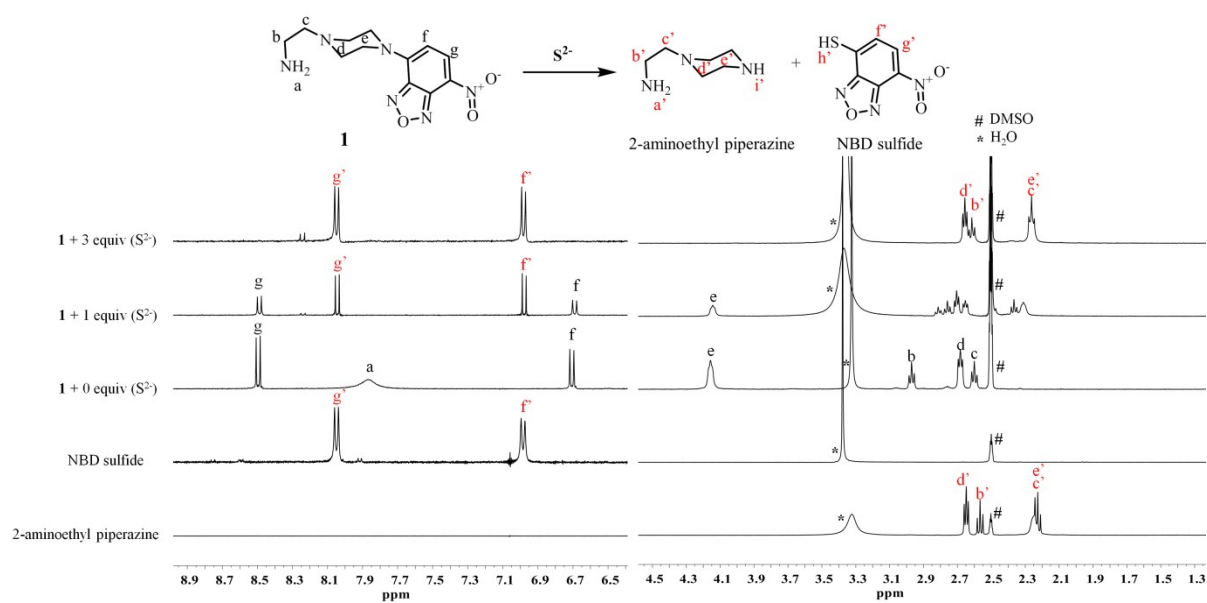

**Fig. S13.**  $^1H$  NMR spectra of **1** upon addition of 0, 1 and 3 equiv of  $S^{2-}$ , compared with NBD-sulfide and 2-aminoethyl piperazine.

(a)

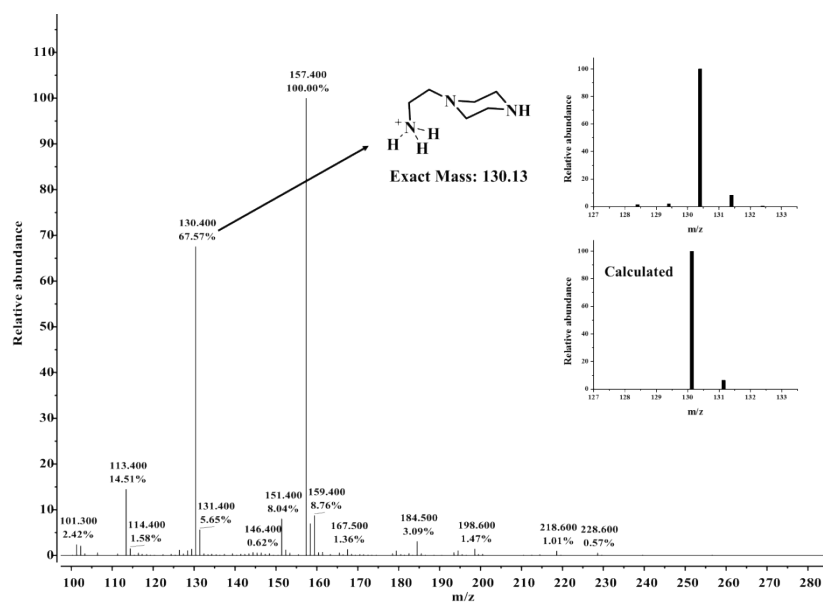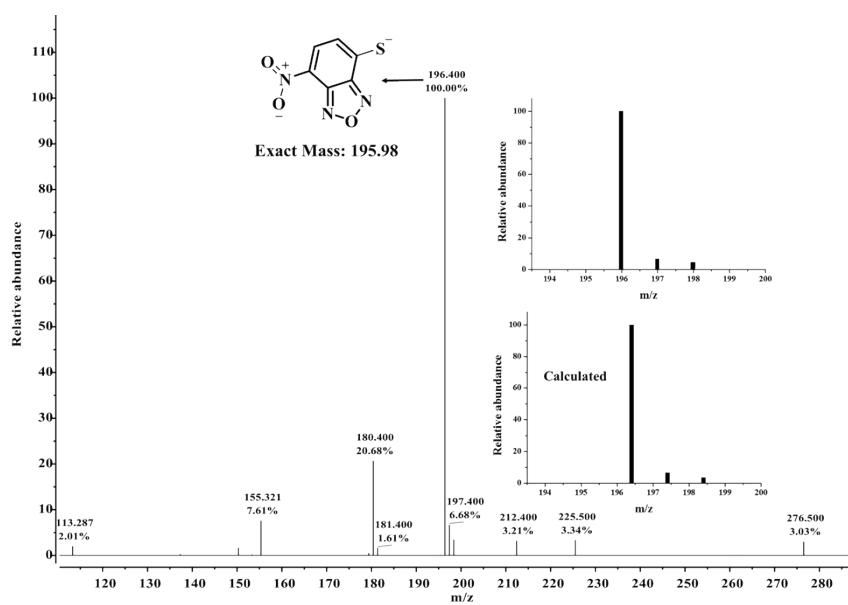

(b)

**Fig. S14.** (a) Positive and (b) negative-ion electrospray ionization mass spectra of **1** (10  $\mu\text{M}$ ) upon addition of  $\text{Na}_2\text{S}\cdot 9\text{H}_2\text{O}$  (1 equiv).

(a)

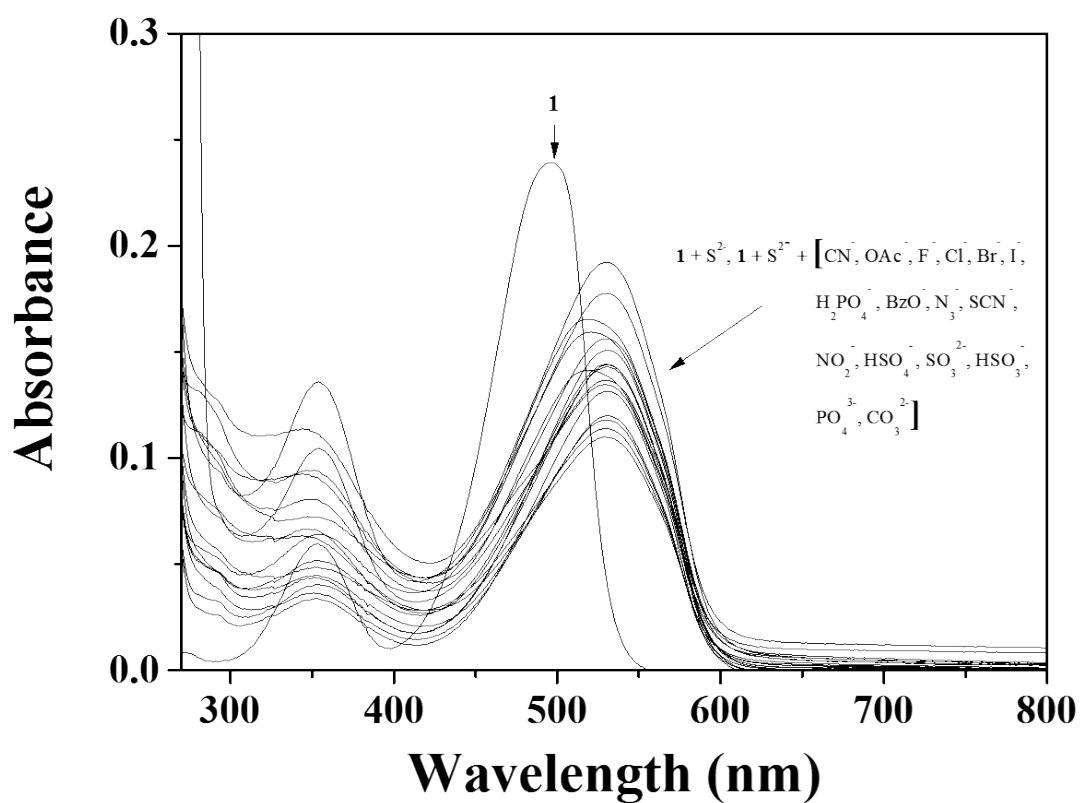

(b)

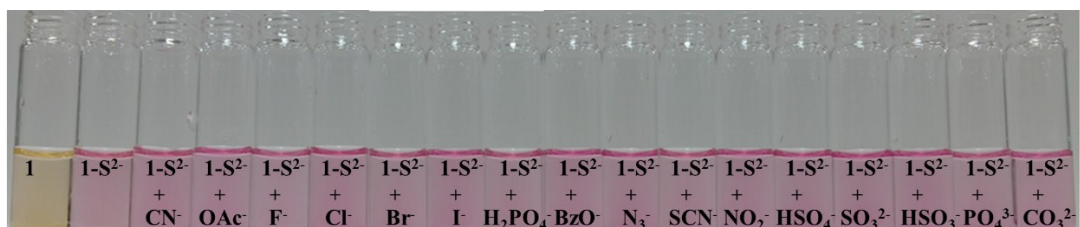

**Fig. S15.** (a) Absorption spectral changes of **1** (10  $\mu\text{M}$ ) upon addition of  $\text{S}^{2-}$  (150 equiv) in the absence and presence of 150 equiv of various anions in bis-tris buffer (10 mM, pH = 7.0). (b)



The color changes of **1** (10  $\mu\text{M}$ ) with  $\text{S}^{2-}$  (150 equiv) in the absence and presence of 150 equiv of various anions in bis-tris buffer (10 mM, pH = 7.0).

(a)

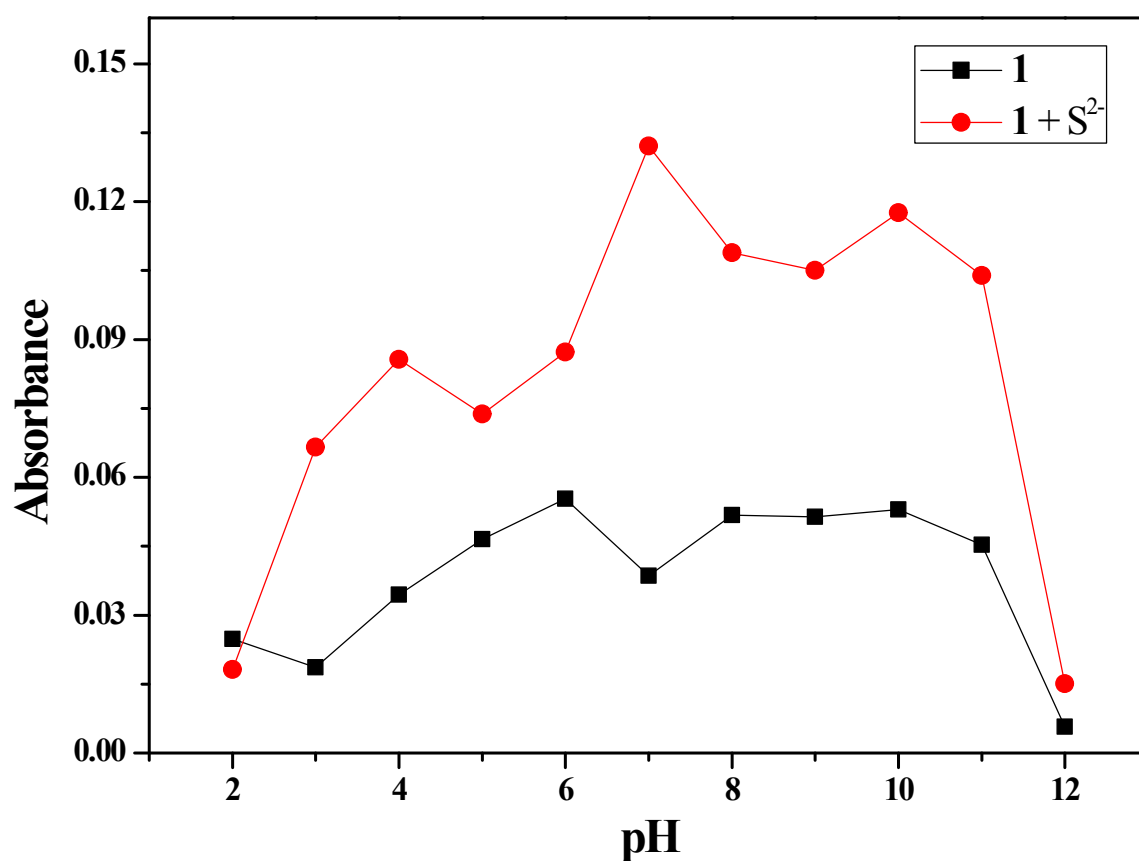

(b)

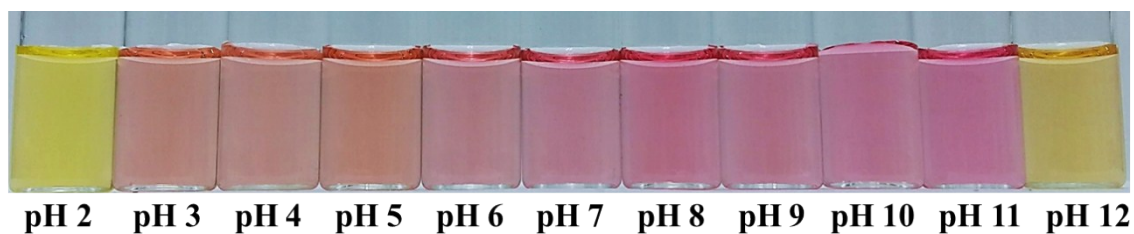

**Fig. S16.** (a) Absorbance (at 531 nm) of **1** and **1-S<sup>2-</sup>** (**1**: 10  $\mu$ M, **S<sup>2-</sup>**: 150 equiv) at different pH (2-12). (b) The color changes of **1-S<sup>2-</sup>** (**1**:10  $\mu$ M, **S<sup>2-</sup>**: 150 equiv) at different pH (2-12).

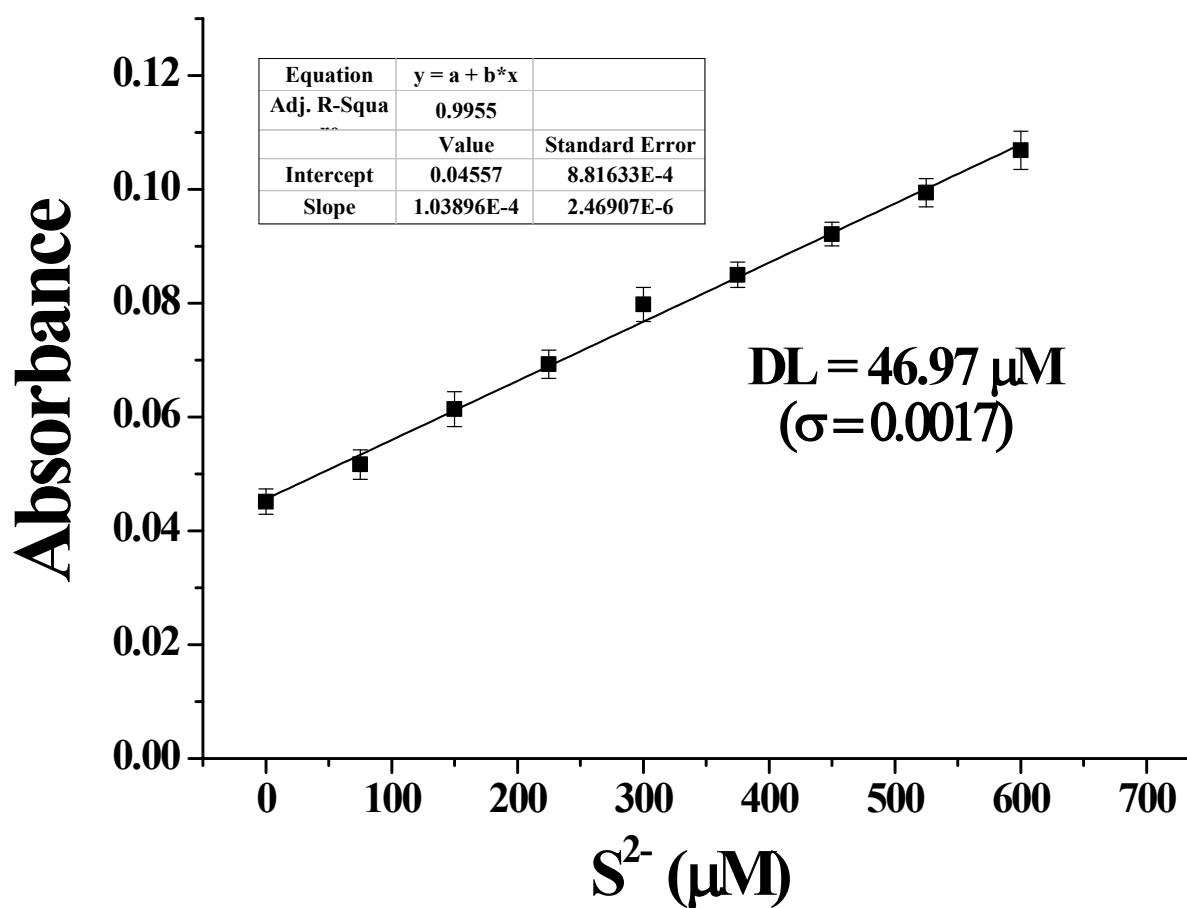

**Fig. S17.** Absorption intensity (at 531 nm) of **1** as a function of **S<sup>2-</sup>** concentration in bis-tris buffer (10 mM bis-tris, pH = 7.0). [**1**] = 10  $\mu$ mol/L and [**S<sup>2-</sup>**] = 0-600  $\mu$ mol/L.
